# Supplementary material for: Dose–response association of screen time-based sedentary behaviour in children and adolescents and depression: a meta-analysis of observational studies
Source: HighWire-hosted journal article supplement (doi:10.1136/bjsports-2015-095084), 2015-11-09
Supplement: bjsports-2015-095084supp1.pdf [file bjsports-2015-095084supp1.pdf]

## 1. How were correlation coefficients converted?

Firstly,

We convert from a correlation ( $r$ ) to a standardized mean difference ( $d$ ) using

$$d = \frac{2r}{\sqrt{1-r^2}}.$$

The variance of  $d$  computed in this way (converted from  $r$ ) is

$$V_d = \frac{4V_r}{(1-r^2)^3}.$$

and then,

We can convert from the standardized mean difference  $d$  to the log odds ratio (*LogOddsRatio*) using

$$\text{LogOddsRatio} = d \frac{\pi}{\sqrt{3}},$$

Where  $\pi$  is the mathematical constant (approximately 3.14159). The variance of *LogOddsRatio* would then be

$$V_{\text{LogOddsRatio}} = V_d \frac{\pi^2}{3}$$

## 2. How were Cohen's d values converted to ORs?

We can convert from the standardized mean difference  $d$  to the log odds ratio (*LogOddsRatio*) using

$$\text{LogOddsRatio} = d \frac{\pi}{\sqrt{3}},$$

Where  $\pi$  is the mathematical constant (approximately 3.14159). The variance of *LogOddsRatio* would then be<sup>1</sup>

$$V_{\text{LogOddsRatio}} = V_d \frac{\pi^2}{3}$$

1. Borenstein M, Hedges LV, Higgins JP, et al. *Introduction to meta-analysis*: John Wiley & Sons, 2009: 47-48.
