# Supplementary material for: Dose–response association of screen time-based sedentary behaviour in children and adolescents and depression: a meta-analysis of observational studies
Source: HighWire-hosted journal article supplement (doi:10.1136/bjsports-2015-095084), 2015-11-09

Figure 3-web appendix. Five-year age-standardised net survival (%), patients diagnosed with primary invasive colorectal cancer in Europe and the US in the late 1990s: region and sex

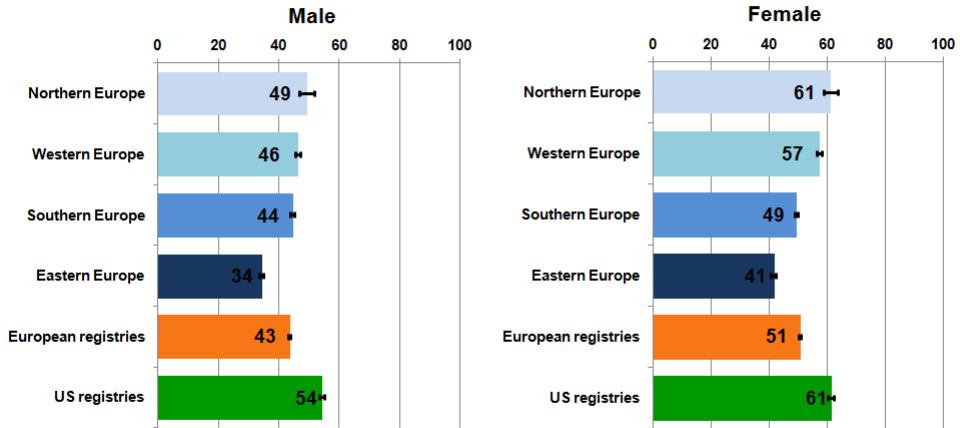

Supplement: bjsports-2015-095084supp1.pdf [file bjsports-2015-095084supp1.pdf]
