# Supplementary material for: Dose–response association of screen time-based sedentary behaviour in children and adolescents and depression: a meta-analysis of observational studies
Source: HighWire-hosted journal article supplement (doi:10.1136/bjsports-2015-095084), 2015-11-09
Supplement: bjsports-2015-095084supp_tableS1.pdf [file bjsports-2015-095084supp_tableS1.pdf]

**Table S1. Characteristics of included studies.**

| <i>Study:<br/>Author (year )(design)</i> | <i>Country<br/>Survey time</i> | <i>No. participants<br/>No. M, No. F</i> | <i>Mean age ± sd<br/>(years)/range</i> | <i>Screen-time : style ;<br/>categories</i>                              | <i>Depression<br/>measure; cutoff</i>                                                                                                   | <i>Adjustment for confounders</i>                                                                                    | <i>Quality<br/>score</i> |
|------------------------------------------|--------------------------------|------------------------------------------|----------------------------------------|--------------------------------------------------------------------------|-----------------------------------------------------------------------------------------------------------------------------------------|----------------------------------------------------------------------------------------------------------------------|--------------------------|
| Allahverdipour et al. (2010) (CS)        | Iran<br>2008                   | 444<br>220 M, 224 F                      | 12–15                                  | VG<br>(hrs/day): 0, <1 (R), 1-1.5, >1.5                                  | General Health Questionnaire (GHQ-28) subscale (depression) cutoff: 8                                                                   | Not indicated                                                                                                        | 3                        |
| B dänger, et al. (2011) (CS)             | Switzerland<br>2002            | 3681<br>2038 M, 1443 F                   | 17.84 ± 0.08                           | CU<br>(hrs/day): <2 (R), >2                                              | Depressive Tendencies Scale. Cutoff: not indicated                                                                                      | Age; academic track; socioeconomic status; chronic condition; physical activity                                      | 4                        |
| Brunborg, et al. (2014) (LS)             | Norway<br>2010-2012            | 1928<br>858 M, 1070 F                    | 13–17                                  | VG/CG:<br>continuous                                                     | Hopkins Symptom Checklist<br><br>Cutoff: not indicated                                                                                  | Age; gender; grades                                                                                                  | 4                        |
| Cao, et al. (2011) (CS)                  | China<br>2010                  | 5003<br>2606 M, 2397 F                   | 13.2 ± 1.00<br>11–16                   | TV; CU<br>(hrs/day): ≤2 (R), >2                                          | Depression Self-rating Scale for Children (DSRSC). Cutoff : 15                                                                          | Gender, grade, family type, perceived socioeconomic status, BMI, fruit and vegetable intake, and fizzy drinks intake | 5                        |
| Casiano, et al. (2012) (CS)              | Canada<br>2000–2001            | 9137<br>4544 M, 4593 F                   | 12 – 19                                | TV;VG;CU<br>(hrs/day): <1/7, <1/3, 0.6-0.8, 0.9-1.5, 1.5-2, 2-3, >3      | Composite International Diagnostic Interview (CIDI) short form (in-person interview). Cutoff: 0.90                                      | Household income; gender                                                                                             | 5                        |
| Chen, et al. (2009) (LS)                 | Taiwan<br>2005–2006            | 10347<br>5129 M, 5218 F                  | Grades 11–12                           | TV/VG; CU.<br>continuous                                                 | 15 items from Centers for Epidemiologic Studies–Depression Scale (CES-D) or Beck’s depression inventory (BDI; paper survey). Cutoff: no | Not indicate                                                                                                         | 3                        |
| Desai, et al. (2010) (CS)                | USA<br>2000                    | 3795<br>1728 M, 2067 F                   | 14–18                                  | VG/CG;<br>(hrs/day): 0 (R), <1, 2, 2-3, >3                               | Report of being sad or hopeless for 2 wks or more in the previous year (paper survey). Cutoff: “yes” or “no”                            | Grade.                                                                                                               | 4                        |
| Godinho, et al. (2014) (CS)              | Porto<br>2003–2004             | 1680<br>796 M, 884 F                     | 13                                     | TV/CU.<br>(hrs/day): Total (≤2, 2-3, >3), TV (≤1, 1-≤2, >2), CU (≤2, >2) | BDI-second edition (II). Paper survey<br>Cutoff: 13. <13(R)                                                                             | Parental education                                                                                                   | 5                        |
| Hoare, et al. (2014) (CS)                | Australia<br>2012              | 670;<br>295 M, 375 F                     | 13.11 ± 0.62<br>11–14                  | TV/VG/CU.<br>(hrs/day): <2 (R), >2                                       | Short moods and feelings questionnaire (SMFQ). Cutoff: 10.                                                                              | Age; parent’s level of education; school the participant attended                                                    | 5                        |

**Table S1. Characteristics of included studies.**

| <i>Study:<br/>Author (year )(design)</i> | <i>Country<br/>Survey time</i>             | <i>No. participants<br/>No. M, No. F</i> | <i>Mean age ± sd<br/>(years)/range</i> | <i>Screen-time : style ;<br/>categories</i>          | <i>Depression<br/>measure; cutoff</i>                                                                                                                                              | <i>Adjustment for confounders</i>                                                                                                                                                                                                       | <i>Quality<br/>score</i> |
|------------------------------------------|--------------------------------------------|------------------------------------------|----------------------------------------|------------------------------------------------------|------------------------------------------------------------------------------------------------------------------------------------------------------------------------------------|-----------------------------------------------------------------------------------------------------------------------------------------------------------------------------------------------------------------------------------------|--------------------------|
| Kim, et al. (2012)<br>(CS)               | South Korea<br>2009                        | 75066<br>39612 M, 35454 F                | 12–18                                  | CU<br>(hrs/day): 0 (R), <1,<br>1-2, >2               | Depression rate: report of being sad or<br>hopeless for 2 wks or more in the previous<br>year. Cutoff :”yes” or ”no”                                                               | Age; physical activity; residing region;<br>type of school; subjective academic<br>performance status; subjective economic<br>status; presence of parents; whether<br>family lives together; sedentary behavior<br>in week and weekend. | 4                        |
| Kremer, et al. (2014)<br>(CS)            | Australia<br>2006                          | 7847                                     | 10–14                                  | TV/ VG / CU<br>(hrs/day): <2 (R), ≥ 2                | SMFQ.<br>Cut-point value ( ≥8 )                                                                                                                                                    | Location and area- socioeconomic status                                                                                                                                                                                                 | 5                        |
| McHale, et al. (2001)<br>(LS)            | USA: Before<br>2001; follow up,<br>2 years | 198<br>96 M, 102 F                       | 10.9 ± 0.54                            | TV.<br>Continuous                                    | Children's depression inventory (CDI)<br>(in-person interview).<br>Cutoff: no                                                                                                      | Parents' education; interview month;<br>child gender                                                                                                                                                                                    | 6                        |
| Messias, et al. (2011)<br>(CS)           | USA<br>2007 & 2009                         | 2007: 4024<br>2009: 4404                 | 16.1 ± 1.2<br>14–18                    | TV; VG;CU<br>(hrs/day): 0 (R), <1,<br>1, 2, 3, 4, ≥5 | During the past 12 months, did you ever<br>feel so sad or hopeless almost every day for<br>2 weeks or more in a row that you stopped<br>doing some usual activities? Cutoff: “yes” | Age; gender; race; smoking                                                                                                                                                                                                              | 5                        |
| Pantic, et al. (2012)<br>(CS)            | Serbia<br>2011                             | 160<br>51 M, 109 F                       | 18.02 ± 0.29                           | TV<br>continuous                                     | BDI-II. Cutoff:: <9 (minimal), 10-18<br>( mild ) , 19-29(moderate), 30-63 (severe)                                                                                                 | Not indicated                                                                                                                                                                                                                           | 2                        |
| Primack,et al. (2009)<br>(LC)            | USA<br>1995–2002                           | 4142;<br>2145 M; 1967 F                  | 14–21                                  | TV; CG<br>Each hour of use                           | CES-D (range, 0-60).<br>cutoff: 24 (F),22 (M)                                                                                                                                      | Baseline CES-D score; age; gender;<br>race/ethnicity; socioeconomic status;<br>ever married; educational achievement of<br>at least graduation from high school                                                                         | 6                        |
| Xin, et al. (2009)<br>(CS)               | China<br>2004                              | 2444;<br>1180 M, 1264 F                  | 13.85 ± 1.04                           | TV<br>Low (R), middle, high.                         | CDI.<br>Cut-off: 20                                                                                                                                                                | Age; gender; school grade; BMI; study<br>time; sleep time; smoking behavior;<br>alcohol consumption; unintentional<br>injuries; parents' educational attainments,<br>parents' job statuses; family structure.                           | 5                        |

Abbreviations: CS = cross sectional; LG = longitudinal study; LC = longitudinal cohort study; ST = screen time; VG = video game use; TV = television viewing; CU = computer use; CG = computer game; F = female; M = male; R = reference; BMI = body mass index.
