# Supplementary material for: Dose–response association of screen time-based sedentary behaviour in children and adolescents and depression: a meta-analysis of observational studies
Source: HighWire-hosted journal article supplement (doi:10.1136/bjsports-2015-095084), 2015-11-09
Supplement: bjsports-2015-095084supp_tableS2.pdf [file bjsports-2015-095084supp_tableS2.pdf]

**Table 2-web appendix. Advanced stage, resection with curative intent, 30-days post-operative mortality, proportion of patients with information on stage and number of lymph nodes examined : colorectal cancer, Europe and the US, 1996-98**

| EUROPE                                 | Registry       | All cases     |                             |           | Resected with curative intent <sup>2</sup> |           |            |          |              |           |              |           |                             |           |              |           |              |           |               |           |
|----------------------------------------|----------------|---------------|-----------------------------|-----------|--------------------------------------------|-----------|------------|----------|--------------|-----------|--------------|-----------|-----------------------------|-----------|--------------|-----------|--------------|-----------|---------------|-----------|
|                                        |                | No.           | Advanced stage <sup>1</sup> |           | Deaths within 30 days                      |           |            |          | Staged       |           |              |           | No. of lymph nodes examined |           |              |           |              |           |               |           |
|                                        |                |               | No.                         | %         | No.                                        | %         | No.        | %        | Colon        |           | Rectum       |           | Zero                        |           | Up to 11     |           | More than 12 |           | Not available |           |
|                                        |                |               |                             |           |                                            |           |            |          | No.          | %         | No.          | %         | No.                         | %         | No.          | %         | No.          | %         | No.           | %         |
| <b>Estonia</b>                         | Estonia        | 560           | 188                         | 34        | 314                                        | 56        | 9          | 3        | 192          | 98        | 118          | 99        | 0                           | 0         | 149          | 47        | 5            | 2         | 160           | 51        |
| <b>Finland</b>                         | Finland        | 523           | 134                         | 26        | 385                                        | 74        | 16         | 4        | 192          | 84        | 142          | 90        | 49                          | 13        | 187          | 49        | 20           | 5         | 129           | 34        |
| <b>France</b>                          | Côte d'Or      | 561           | 141                         | 25        | 430                                        | 77        | 24         | 6        | 302          | 100       | 127          | 99        | 62                          | 14        | 255          | 59        | 113          | 26        | 0             | 0         |
| <b>Italy</b>                           | Genova         | 589           | 153                         | 26        | 503                                        | 85        | 37         | 7        | 313          | 95        | 164          | 95        | 1                           | 0         | 219          | 44        | 171          | 34        | 112           | 22        |
|                                        | Varese         | 500           | 133                         | 27        | 395                                        | 79        | 8          | 2        | 270          | 100       | 120          | 96        | 12                          | 3         | 201          | 51        | 156          | 39        | 26            | 7         |
| <b>Netherlands</b>                     | North East NL  | 1,936         | 468                         | 24        | 1,662                                      | 86        | n.a        | n.a      | 997          | 92        | 519          | 90        | -                           | -         | -            | -         | -            | -         | 1,662         | 100       |
| <b>Poland</b>                          | Cracow         | 512           | 187                         | 37        | 303                                        | 59        | 9          | 3        | 146          | 94        | 141          | 96        | 6                           | 2         | 210          | 69        | 25           | 8         | 62            | 20        |
|                                        | Kielce         | 271           | 91                          | 34        | 211                                        | 78        | 19         | 9        | 103          | 98        | 97           | 92        | 0                           | 0         | 36           | 17        | 3            | 1         | 172           | 82        |
| <b>Slovakia</b>                        | Slovakia       | 581           | 195                         | 34        | 367                                        | 63        | 19         | 5        | 215          | 100       | 149          | 99        | 7                           | 2         | 155          | 42        | 1            | 0         | 204           | 56        |
| <b>Slovenia</b>                        | Slovenia       | 937           | 283                         | 30        | 652                                        | 70        | 44         | 7        | 322          | 97        | 315          | 98        | 26                          | 4         | 243          | 37        | 327          | 50        | 56            | 9         |
| <b>Spain</b>                           | Granada        | 567           | 186                         | 33        | 442                                        | 78        | 30         | 7        | 273          | 96        | 151          | 96        | 4                           | 1         | 238          | 54        | 135          | 31        | 65            | 15        |
|                                        | Navarra        | 588           | 172                         | 29        | 452                                        | 77        | 15         | 3        | 259          | 98        | 186          | 98        | 0                           | 0         | 201          | 44        | 133          | 29        | 118           | 26        |
|                                        | Tarragona      | 637           | 204                         | 32        | 468                                        | 73        | 18         | 4        | 311          | 98        | 145          | 96        | 0                           | 0         | 174          | 37        | 244          | 52        | 50            | 11        |
| <b>European registries<sup>3</sup></b> |                | <b>8,762</b>  | <b>2,535</b>                | <b>29</b> | <b>6,584</b>                               | <b>75</b> | <b>248</b> | <b>5</b> | <b>3,895</b> | <b>95</b> | <b>2,374</b> | <b>95</b> | <b>167</b>                  | <b>3</b>  | <b>2,268</b> | <b>34</b> | <b>1,333</b> | <b>20</b> | <b>2,816</b>  | <b>43</b> |
| Northern Europe                        |                | 523           | 134                         | 26        | 385                                        | 74        | 16         | 4        | 192          | 84        | 142          | 90        | 49                          | 13        | 187          | 49        | 20           | 5         | 129           | 34        |
| Western Europe <sup>4</sup>            |                | 2,497         | 609                         | 24        | 2,092                                      | 84        | 24         | 6        | 1,299        | 93        | 646          | 92        | 62                          | 3         | 255          | 12        | 113          | 5         | 1,662         | 79        |
| Southern Europe <sup>5</sup>           |                | 3,818         | 1,131                       | 30        | 2,912                                      | 76        | 152        | 5        | 1,748        | 97        | 1,081        | 97        | 43                          | 1         | 1,276        | 44        | 1,166        | 40        | 427           | 15        |
| Eastern Europe                         |                | 1,924         | 661                         | 34        | 1,195                                      | 62        | 56         | 5        | 656          | 98        | 505          | 97        | 13                          | 1         | 550          | 46        | 34           | 3         | 598           | 50        |
| <b>US</b>                              |                |               |                             |           |                                            |           |            |          |              |           |              |           |                             |           |              |           |              |           |               |           |
|                                        | California     | 495           | 112                         | 23        | 415                                        | 84        | 15         | 4        | 294          | 96        | 102          | 93        | 37                          | 9         | 215          | 52        | 156          | 38        | 7             | 2         |
|                                        | Colorado       | 548           | 113                         | 21        | 468                                        | 85        | 18         | 4        | 335          | 95        | 109          | 93        | 24                          | 5         | 238          | 51        | 199          | 43        | 7             | 1         |
|                                        | Illinois       | 505           | 112                         | 22        | 422                                        | 84        | 21         | 5        | 320          | 97        | 85           | 93        | 49                          | 12        | 191          | 45        | 176          | 42        | 6             | 1         |
|                                        | Louisiana      | 511           | 105                         | 21        | 431                                        | 84        | 26         | 6        | 315          | 100       | 111          | 97        | 62                          | 14        | 226          | 52        | 142          | 33        | 1             | 0         |
|                                        | New York       | 492           | 80                          | 16        | 411                                        | 84        | 22         | 5        | 287          | 95        | 102          | 94        | 34                          | 8         | 216          | 53        | 150          | 36        | 11            | 3         |
|                                        | Rhode Island   | 418           | 78                          | 19        | 369                                        | 88        | 9          | 2        | 268          | 99        | 93           | 94        | 37                          | 10        | 202          | 55        | 130          | 35        | 0             | 0         |
|                                        | South Carolina | 368           | 76                          | 21        | 316                                        | 86        | 13         | 4        | 220          | 96        | 75           | 87        | 28                          | 9         | 174          | 55        | 107          | 34        | 7             | 2         |
| <b>US registries</b>                   |                | <b>3,337</b>  | <b>676</b>                  | <b>20</b> | <b>2,832</b>                               | <b>85</b> | <b>124</b> | <b>4</b> | <b>2,039</b> | <b>97</b> | <b>677</b>   | <b>93</b> | <b>271</b>                  | <b>10</b> | <b>1,462</b> | <b>52</b> | <b>1,060</b> | <b>37</b> | <b>39</b>     | <b>1</b>  |
| <b>Total</b>                           |                | <b>12,099</b> |                             |           |                                            |           |            |          |              |           |              |           |                             |           |              |           |              |           |               |           |

<sup>1</sup> All metastatic cases, plus unresected cases for which no stage data were available

<sup>2</sup> Curative intent: surgery not specified as palliative, or tumour entirely resected

<sup>3</sup> Northern Europe: Finland; Western Europe: France (Côte d'Or), the Netherlands (North East Netherlands); Southern Europe: Italy (Genova, Ragusa, Varese), Slovenia, Spain (Granada, Navarra, Tarragona); Eastern Europe: Estonia, Poland (Cracow, Kielce), Slovakia

<sup>4</sup> Data for North East Netherlands (1,936) are not included in the proportion of deaths within 30 days of surgery for Western Europe because the date of surgery was not available

<sup>5</sup> Data for Ragusa (424) are not included in the percentages of Dukes' stage for Southern Europe
