# Supplementary figures and images for: Dose–response association of screen time-based sedentary behaviour in children and adolescents and depression: a meta-analysis of observational studies
Source: HighWire-hosted journal article supplement (doi:10.1136/bjsports-2015-095084), 2015-11-09

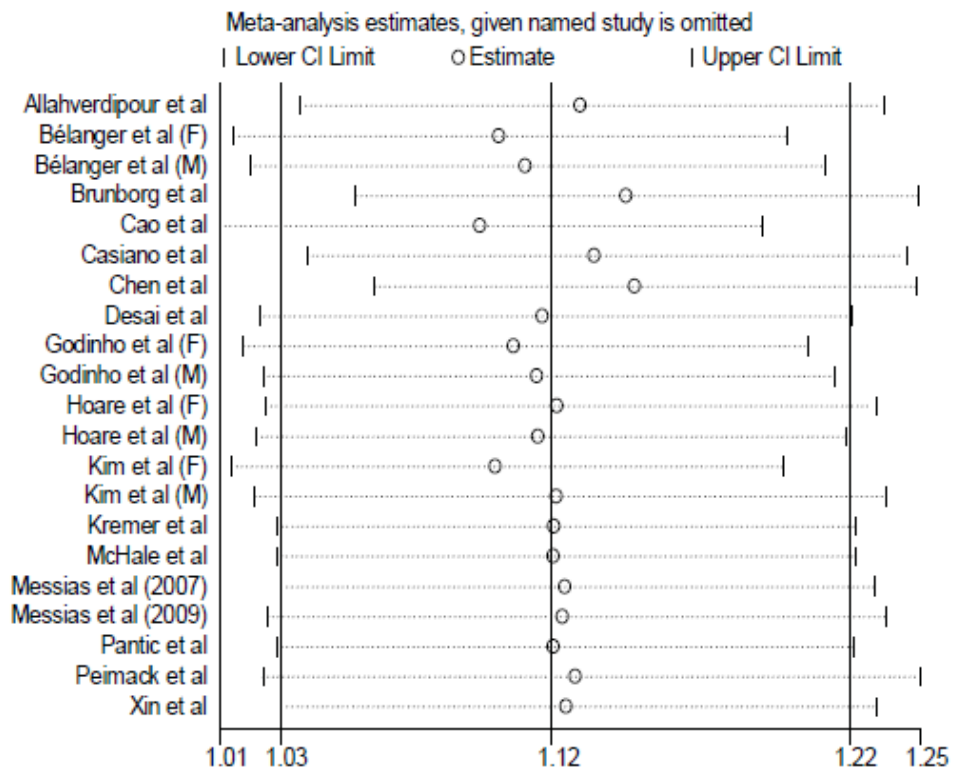

Figure S1. Sensitivity analysis of overall meta-analysis.

Supplement: bjsports-2015-095084supp_figureS1.pdf [file bjsports-2015-095084supp_figureS1.pdf]
